1 Effect of photobiomodulation to control pain after placement of elastomeric spacers: a  
2 randomized controlled study protocol

3

4 Luis Eduardo Pascuali Moya<sup>1,2,#a,#b</sup>, & [dr.luisepm@gmail.com](mailto:dr.luisepm@gmail.com)

5 Rolf Wilhem Consolandich Cirisola<sup>1,2,#a,#b</sup>, & [drconsolandich@gmail.com](mailto:drconsolandich@gmail.com)

6 María Victoria García Olazabal<sup>1,2,#b,#a</sup>, ¶ [garciaolazabal@gmail.com](mailto:garciaolazabal@gmail.com)

7 Laura Hermida Bruno<sup>1,2,#b,#a</sup>, ¶ [laurahermidabruno@gmail.com](mailto:laurahermidabruno@gmail.com)

8 Federico Todeschini Safi<sup>1,2,#b,#a</sup>, ¶ [federico.todeschini@ucu.edu.uy](mailto:federico.todeschini@ucu.edu.uy)

9 Lucia Piriz Trindade<sup>1,2,#b,#a</sup>, ¶ [lucia.piriz@ucu.edu.uy](mailto:lucia.piriz@ucu.edu.uy)

10 Priscila Larcher Longo<sup>3,#c,#a</sup>, ¶ [pllongo@gmail.com](mailto:pllongo@gmail.com)

11 Maria Cristina Chavantes<sup>1#a</sup>, & [lunglasertherapy@yahoo.com.br](mailto:lunglasertherapy@yahoo.com.br)

12 Ricardo Scarparo Navarro<sup>4,#d</sup>, ¶ [ricardosnavarro@gmail.com](mailto:ricardosnavarro@gmail.com)

13 Cinthya Cosme Gutierrez Duran<sup>1#a</sup>, & [cduran@uni9.pro.br](mailto:cduran@uni9.pro.br)

14 Kristianne Porta Santos Fernandes<sup>1#a</sup>, & [kristianneporta@gmail.com](mailto:kristianneporta@gmail.com)

15 Raquel Agnelli Mesquita Ferrari<sup>1#a</sup>, & [raquel.mesquita@gmail.com](mailto:raquel.mesquita@gmail.com)

16 Sandra Kalil Bussadori<sup>1#a</sup>, & [sandra.skb@gmail.com](mailto:sandra.skb@gmail.com)

17 Lara Jansiski Motta<sup>1#a</sup>, & [larajmotta@uni9.pro.br](mailto:larajmotta@uni9.pro.br)

18 Anna Carolina Ratto Tempestini Horliana<sup>1#a¶\*</sup> [annacrth@gmail.com](mailto:annacrth@gmail.com)

19

20 <sup>1</sup>Postgraduate Program in Biophotonics Applied to Health Sciences, Universidade Nove  
21 de Julho (UNINOVE), São Paulo, Brazil.

22 <sup>2</sup>Universidad Católica del Uruguay (UCU), Montevideo, Uruguay.

23 <sup>3</sup>Postgraduate Program in Aging Science, Universidade São Judas Tadeu (USJT), São  
24 Paulo, Brazil

25 <sup>4</sup> Universidade Brasil, São Paulo, Brazil

26 <sup>#a</sup> Current adress: Universidade Nove de Julho (UNINOVE), São Paulo, Brazil.

27 <sup>#b</sup> Current adress: Universidad Católica del Uruguay (UCU), Montevideo, Uruguay

**NOTE: This preprint reports new research that has not been certified by peer review and should not be used to guide clinical practice.**

1 #<sup>c</sup> Current adress Universidade São Judas Tadeu (USJT), São Paulo, Brazil

2 #<sup>d</sup> Current adress Universidade Brasil, São Paulo, Brazil

3

4 ¶ These authors contributed equally to this work.

5 & These authors also contributed equally to this work.

6

7 **Corresponding Author:**

8 E-mail: [annacrth@gmail.com](mailto:annacrth@gmail.com) (ACRTH)

9 Orcid iD: 0000-0003-3476-9064

- 10
- 11 • **data availability Statement-** all data will be available for the readers.
  - 12 • **funding Statement** – The project receives a grant from the National Council for Scientific and Technological Development process (CNPq:3146682020-9).
  - 13 • **conflict of interest disclosure** All authors disclose any financial and personal relationships with other people or organizations that could inappropriately influence (bias) this study.
  - 14 • **ethics approval Statement** - The project received approval from the Research Ethics Committee of Universidad Católica del Uruguay (UCU), process: 221014b.
  - 15 • **patient consent Statement** – All the participants included signed an Informed consent.
  - 16 • **clinical trial registration:** NTC05924204 (version 08/2023)
- 17
- 18
- 19
- 20
- 21

22

23

24 **ABSTRACT**

25 Recent studies have shown that photobiomodulation (FBM) can modulate pain after the  
26 placement of elastomeric separators, however, to date, there is no ideal protocol for its  
27 application. Therefore, the objective of this study will be to evaluate the effect of  
28 photobiomodulation on pain control 24 hours after the placement of elastomeric  
29 separators using the visual analog scale (VAS). Twenty-five participants between 13 and  
30 30 years old with the need for the placement of orthodontic bands in the lower first molars  
31 bilaterally will be included, which establishes a sample of fifty molars (right and left).  
32 Elastomeric separators will be placed on the mesial and distal surfaces of the right and  
33 left molars. The study groups will be G1 (experimental) - elastomeric separators + FBM  
34 (diode laser, 808nm, 100mw power, with 4 J, 3 points per vestibular and 3 points per

1 palatal, single session) and G2-(control)- elastomeric separators + FBM simulation.  
2 Treatment will be randomized to the right molar and the opposite treatment will be  
3 applied to the left side. The patient and the evaluator will be blinded to the intervention  
4 performed. The primary outcome variable will be spontaneous pain assessed 24 hours  
5 after the placement of elastomeric separators measured with the VAS scale. Secondary  
6 outcome variables will be pain during mastication (measured with the VAS scale) at 72h  
7 after the placement, count of the number of analgesics (paracetamol), and local  
8 temperature (measured with a digital thermometer). To assess the impact of oral health  
9 on quality of life. of the participant, the OHIP-14 questionnaire will be applied. All the  
10 outcomes will be evaluated at baseline, 24 and 72 hours after the placement of elastomeric  
11 separators. If the data are normal, they will be submitted to the ANOVA – one-way test.  
12 Data will be presented as means  $\pm$  SD and the p-value will be set to  $< 0.05$ .  
13 **Keywords:** photobiomodulation, elastomeric separators, orthodontic bands, orthodontic  
14 treatment, low-level phototherapy

15

## 16 **Introduction**

17 The demand for orthodontic treatment has increased exponentially in recent  
18 decades (Pacheco-Pereira et al., 2015), however, pain remains a limiting factor for this  
19 treatment (Eslamian et al., 2014). The placement of elastomeric separators is strongly  
20 associated with pain and discomfort (Borzabadi-Farahani et al., 2017). Patients report that  
21 the placement of elastomeric separators is the most painful part of the entire treatment  
22 (Farias et al., 2017). It is reported that 90% of patients undergoing orthodontic treatment  
23 experience varying degrees of pain after placement of elastomeric separators, initial wire  
24 insertions, and activations. (Qamrudin et al., 2014). In general, it starts after 4 hours of  
25 inserting the separator, reaches its peak within 24 hours, remains uncomfortable for the  
26 next 3 days, and subsides and dissipates in approximately 6 to 8 days (Abtahi et al., 2013)

27 The tooth movement generated is a biological process caused by forces that are  
28 transmitted through biochemical signals and its answer depends on the physiology of the  
29 tissues (Krishnan et al., 2009). Cells and interleukins participate in this process through  
30 various interactions (Jeon et al., 2021) causing acute inflammation in the periodontal  
31 tissue (Jeon et al., 2021; Li et al., 2018). As the pain is generated from an inflammatory

1 process, non-steroidal anti-inflammatory drugs (NSAIDs) are the gold standard to reduce  
2 discomfort (Kohli et al., 2011). However, in addition to the systemic adverse effects of  
3 these medications, caution must be considered of their influence on decelerating rate  
4 movement of the teeth. (Qamruddin et al., 2014)

5 Photobiomodulation is effective in controlling pain in several areas of dentistry,  
6 however, until now there is no ideal application protocol for its reduction after the  
7 placement of elastomeric separators. A systematic review showed that the laser  
8 application method and the laser parameters were widely varied in tested protocols  
9 (Farzan et al., 2014). Establishing ideal parameters for pain reduction with laser is the  
10 objective of several authors (Qamruddin et al., 2014, Abtahi et al., 2013, Borzabadi-  
11 Farahani et al., 2017) and meanwhile, more evidence is necessary to define the ideal  
12 dosimetric protocol to mitigate pain after placing elastomeric separators (Farzan et al.,  
13 2014). The most used protocol includes diode, such as aluminum arsenic, and gallium  
14 applied continuously and in direct contact with irradiated areas in the near-infrared range  
15 (Farzan et al., 2014). It was also observed that double irradiation did not present an  
16 advantage over irradiation in a single dose, also, that is observed that it is better to start  
17 the treatment as soon as possible, preferably immediately after placing the elastomeric  
18 separators (Farzan et al., 2014). However, more evidence is needed to determine the best  
19 dosimetry and the best intervention protocol. Therefore, the primary objective of the study  
20 is to assess whether photobiomodulation can promote pain control (spontaneous and  
21 during mastication) immediately after placing elastomeric separators through the visual  
22 analog scale (VAS).

## 23 **Methods**

24 This randomized, controlled, double-blind, split-mouth clinical trial meets the criteria  
25 for designing a clinical study as outlined in the SPIRIT Statement (Figure 1). The study  
26 received approval from the Committee for Ethics in Research (CEP) at the Universidad  
27 Católica del Uruguay (#221014b) on 14<sup>th</sup> October 2022. Participants will be recruited  
28 from patients undergoing orthodontic treatment at the Orthodontic Clinic of the  
29 Specialization Course in Orthopedics and Orthodontics at the Catholic University of  
30 Uruguay, located in Montevideo, Uruguay. This treatment involves the installation of  
31 bands on the lower first permanent molars (both left and right). We have not prospectively  
32 recruited human participants for the study (conducted a clinical trial, distributed  
33 questionnaires, or obtained tissues, data, or samples for the purposes of this study). The

1 study will start in 30<sup>th</sup> September and will finish in 30<sup>th</sup> July 2024. This study does not  
2 include minors. All the participants provided informed consent (written and verbal). This  
3 document was approved by our Ethics Committee. This study are not reporting a retrospective  
4 study of medical records or archived samples.

5 Any future changes to the study will be promptly reported to the CEP and will be  
6 disclosed in subsequent publications. A signed copy of the informed consent form will be  
7 provided to each participant via email. The principal researcher will apply the IC. The  
8 project has been registered on the ClinicalTrials.gov website (NTC05924204). No  
9 conflicts of interest exist regarding any products used in the study or any authors involved.  
10 The study data will be published without any restrictions on data inclusion. All data will  
11 be available for consultation, and participants will have access to their medical records at  
12 any time. All data will be managed by the principal researcher on a computer with  
13 password and no internet.

#### 14 **Description of the sample**

15 This investigation will be realized in the Orthodontic Department of the Clinic  
16 associated with the Specialization Course in Orthopedics and Orthodontics at the Catholic  
17 University of Uruguay. The study will include individuals requiring metallic devices by  
18 the Roth prescription, along with the necessity for the placement of an orthodontic band.  
19

#### 20 **Inclusion/exclusion criteria**

21 Participants' inclusion criteria are:

- 22 • Need to place bilateral orthodontic bands on the lower first molars.
- 23 • Age 13 to 30 years old.
- 24 • Both genders
- 25 • No comorbidities.
- 26 • Never used orthodontic appliances.
- 27 • Preserved surrounding spaces.
- 28 • Healthy permanent dentition with good hygiene.

29 Participants' exclusion criteria are:

- 30 • Who are taking drugs that affect bone metabolism and the inflammatory process (for  
31 example corticosteroids, bisphosphonates), who have used anti-inflammatory drugs or  
32 analgesics for less than 1 week since placing elastomeric separators.
- 33 • Present general pathologies (craniofacial anomalies) and local ones (dental anomalies)  
34 that affect the result of the movement of the teeth,

- 1 • Smokers, embarrassed, or breastfeeding women.
- 2 • Allergic to paracetamol
- 3 • Use of any drugs, different from those prescribed by investigators

#### 4 **Sample size calculation**

5 The sample size to evaluate the analgesic effect of PBM was determined based on  
6 previous studies by Qamruddin et al., 2016 using the G\*Power software (version 3.1.9.2).  
7 An average spontaneous pain of 5 was considered on the VAS scale in the control group  
8 and 2 in the laser treatment group after 24 hours. The highest standard deviation found  
9 ( $\pm 3.24$ ) was used. Considering a significance level of 5%, test power of 80%, and size  
10 effect of 0.60 for the detection of differences between groups, a total of 25 patients will  
11 be required for each group which totalizes 50 patients.

#### 12 **Training of examiners**

13 An examiner, with experience in dentistry and specialization in orthodontics, will  
14 practice the visual analog scale.

#### 15 **Randomization**

16 For randomization, a program available on the internet and a random sequence  
17 generator (<https://www.sealedenvelope.com/>) will be used. The treatment for the molar  
18 on the right side will be randomized, and on the left side, the opposite intervention will  
19 be performed (Figure 2 ). Opaque envelopes will be identified with sequenced numbers  
20 within the corresponding group (experimental or control) and will be introduced  
21 according to the generated random sequence. The envelopes will be sealed and remain  
22 sealed in a safe place until the end of the statistical analysis. The generation of the random  
23 sequence and the preparation of the envelope will be carried out by a person not directly  
24 involved in the study.

#### 25 **Evaluations before treatment**

26 Firstly, the participants who are interested in participating in the study will read the  
27 informed consent (IC) and the investigator will perform a verbal explanation. If they  
28 accept to participate, they will sign the term (IC) and fill anamnesis form. The researcher  
29 will apply the OHIP-14 questionnaire.

#### 30 **Placement of elastomeric separators**

31 Each elastomeric separator (AO Sheboygan, Wisconsin), will be placed with a  
32 dental hilum (Oral B; Procter & Gamble, Cincinnati, Ohio) between the mesial and distal

1 interproximal contacts of the first permanent lower molars on both sides, always starting  
2 from the right side.

3 Before any intervention, the investigator responsible for applying the FBM will  
4 remove and open 1 envelope (without changing the numerical sequence of envelopes).  
5 Thus the investigator will undergo the intervention according to the assigned group,  
6 starting always on the right side. On the left side, the treatment will be the opposite of the  
7 one designated by randomization.

8 Thus, the 25 participants (50 bilateral molars) will be randomly assigned to groups G1 or  
9 G2:

10 **Treatment group** - Photobiomodulation (n=25 lower molars): Immediately after placing  
11 the elastomeric separators, the photobiomodulation will be performed as follows: 3  
12 applications per buccal and 3 applications perlingual on the first lower molars, in a single  
13 session. Two applications will be made on the cervical third (on the mesial and distal side  
14 of the molar primer) and one application on the apical third of the roots. (Figure 3). A Ga-  
15 Al-As laser (Therapy XT, DMC Equipamentos, São Carlos, Brazil) will be used with an  
16 output power of 100 mW. The tip of the device will be placed perpendicular to the  
17 mucosa, in contact, but without exerting pressure. Each point will be irradiated with 4 J  
18 for 40 seconds, totaling 24 J per tooth (12 J on the buccal side and 12 J on the lingual  
19 side). Table 1 shows the dosimetric parameters, based on a previous study (Ortega, 2019).

20 The description of the equipment, the dosimetric parameters, and the number of FBM applications  
21 are described in Table 1

| Parameters                            | Values/Treatment    |
|---------------------------------------|---------------------|
| Wavelength [nm]                       | 808                 |
| operating mode                        | Continuous          |
| Radiant power [mW]                    | 100                 |
| Irradiance [mW/cm <sup>2</sup> ]      | 35                  |
| Surface area [cm <sup>2</sup> ]       | 0,002826            |
| Exposure time [s]                     | 40 (each point)     |
| Radiant exposure [J/cm <sup>2</sup> ] | 1.415               |
| Radiant energy [J]                    | 4                   |
| Number of irradiated points           | 6 points per tooth: |

|   |                                  |                                                                     |
|---|----------------------------------|---------------------------------------------------------------------|
| 1 |                                  | Vestibular (2 cervical and 1 apical)                                |
| 2 |                                  | Palatine (2 cervical and 1 apical)                                  |
| 3 | application technique            | In contact, at 90 degrees with the surface                          |
|   | Number of sessions and frequency | Single session, immediately after placing the elastomeric separator |

4 **Table 1: Dosimetric parameters (Ortega et al, 2019)**

5

6 **Control Group** - Simulation of Photobiomodulation (n=25 lower molars): The teeth that  
7 will receive the FBM simulation will be treated identically to the G1 group. The person  
8 responsible for applying FBM will simulate the irradiations by placing the devices in the  
9 same places described for the FBM group, however, the equipment will remain off. The  
10 sound of the devices will be simulated to blind the intervention.

11 There are no criteria for discontinuing, because no adverse effects are expected

## 12 **Blinding**

13 The research team will be:

- 14 • Orthodontist: who supervises all the procedures and does not know in which teeth the  
15 FBM is being applied.
- 16 • Examiner - (will carry out all the analysis of the results, apply the visual analog scale  
17 and evaluate the number of drugs ingested. This investigator will be aware of the  
18 interventions carried out in the groups).
- 19 • Investigator who will perform the intervention (or simulation) of FBM in patients. Only  
20 this investigator will know all the nature of interventions. The identification of each group  
21 will be revealed by this researcher after the statistical analysis of the data.
- 22 • Estatistic– will be blind regarding the treated groups (she will receive the sheets with  
23 G1 and G2 information only).
- 24 • Participants - will not know the interventions performed because the FBM will be  
25 simulated in the control group.

## 26 **Outcomes**

- 27 • Pain - through the Visual Analog Scale (VAS) at the beginning, 24 hours after  
28 FBM (primary outcome), and 72 hours after FBM (secondary outcome). Patients  
29 will report their perception of pain by marking their level of discomfort on the  
30 visual analog scale (VAS), which ranges from 0 (absence of pain) to 10  
31 (unbearable pain).



- 1 • Number of analgesics taken within a period of 3 days. The analgesic used will  
2 only be paracetamol. Participants will be instructed to use the medication if  
3 necessary and they will be given a paracetamol blister.
- 4 • The quality of life-related to oral health will be evaluated using the OHIP-14  
5 questionnaire at the beginning and 3 days after treatment.
- 6 • Local temperature - evaluated using a digital thermometer in baseline, 24 h, and  
7 72 h after treatment.

## 8 **Statistical analysis**

9 Initial descriptive analyses will be performed, considering all the variables  
10 measured in the study, both quantitative (mean and standard deviation) and qualitative  
11 (frequencies and percentages). Subsequently, normality analyses will be conducted.  
12 Based on the results of these tests, appropriate statistical tests will be selected for each  
13 specific analysis. A significance level of 5% probability or the corresponding p-value will  
14 be used for all tests. All analyses will be executed using the statistical software SPSS for  
15 Windows, version 9.1.

## 16 **REFERENCES**

- 17 Pachêco-Pereira C, Pereira JR, Dick BD, Perez A, Flores-Mir C. Fatores associados à satisfação  
18 do paciente e dos pais após tratamento ortodôntico: revisão sistemática. *Am J Orthod Orntofacial*  
19 *Orthop.* 2015 Out;148(4):652-9. doi: 10.1016/j.ajodo.2015.04.039. 26432321.
- 20 Eslamian L, Borzabadi-Farahani A, Hassanzadeh-Azhiri A, et al. The effect of 810-nm low-level  
21 laser therapy on pain caused by orthodontic elastomeric separators. *Lasers Med Sci* 2014;29:559–  
22 64.
- 23 Borzabadi-Farahani A, Cronshaw M. Lasers in orthodontics. *Lasers in Dentistry—Current*  
24 *Concepts.* Springer; 2017. p. 247-71. doi:10.1007/978-3-319-51944-9\_12
- 25 Farias RD, Motta RH. Low-level laser therapy for controlling pain in orthodontic patients during  
26 the use of elastic separators: a randomized clinical trial. *Laser Phys Lett.* 2018;15(9):095602.  
27 doi:10.1088/1612-202x/aad1c1
- 28 Qamruddin I, Alam MK, Fida M, Khan AG. Effect of a single dose of low-level laser therapy on  
29 spontaneous and chewing pain caused by elastomeric separators. *Am J Orthod Dentofacial*  
30 *Orthop.* 2016 Jan;149(1):62-6. doi: 10.1016/j.ajodo.2015.06.024. PMID: 26718379.
- 31 Abtahi SM, Mousavi SA, Shafae H, Tanbakuchi B. Effect of low-level laser therapy on dental  
32 pain induced by separator force in orthodontic treatment. *Dent Res J (Isfahan).* 2013  
33 Sep;10(5):647-51. PMID: 24348624; PMCID: PMC3858741
- 34 Krishnan V, Davidovitch Z. Em um caminho para a implantação dos mecanismos biológicos do  
35 movimento ortodôntico do dente. *J Dent Res.* 2009; **88**:597-608. doi:  
36 10.1177/00222034509338914. [[PubMed](#)] [[CrossRef](#)] [[GoogleScholar](#)]

- 1 Jeon HH, Teixeira H, Tsai A. Visão mecanicista do movimento odontológico ortodôntico com  
2 base em estudos em animais: Revisão crítica. J Clin Med. 2021 Abr 16;10(8):1733. doi:  
3 10.3390/jcm10081733. 33923725; PMID: PMC8072633.
- 4 Li Y, Jacox LA, Little SH, Ko CC. Movimento Odontológico Ortodôntico: Biologia e  
5 Implicações Clínicas. Kaohsiung J Med Sci. 2018 Abr;34(4):207-214. doi:  
6 10.1016/j.kjms.2018.01.007. Epub 2018 Feb 3. 29655409.
- 7 Kohli SS, Kohli VS. Effectiveness of piroxicam and ibuprofen premedication on orthodontic  
8 patients' pain experiences: a randomized control trial. Angle Orthod 2011;81:1097-102.
- 9 Farzan A, Khaleghi K. The Effectiveness of Low-Level Laser Therapy in Pain Induced by  
10 Orthodontic Separator Placement: A Systematic Review. J Lasers Med Sci. 2021 Jun 24;12:e29.  
11 doi: 10.34172/jlms.2021.29. PMID: 34733752; PMID: PMC8558704.
- 12 Ortega SM, Gonçalves MLL, da Silva T, Horliana ACRT, Motta LJ, Altavista OM, Olivian SR,  
13 Santos AECGD, Martimbianco ALC, Mesquita-Ferrari RA, Fernandes KPS, Bussadori SK.  
14 Evaluation of the use of photobiomodulation following the placement of elastomeric separators:  
15 Protocol for a randomized controlled clinical trial. Medicine (Baltimore). 2019  
16 Oct;98(43):e17325. doi 10.1097/MD.000000000017325. PMID: 31651838; PMID:  
17 PMC6824799.

## Flow diagram

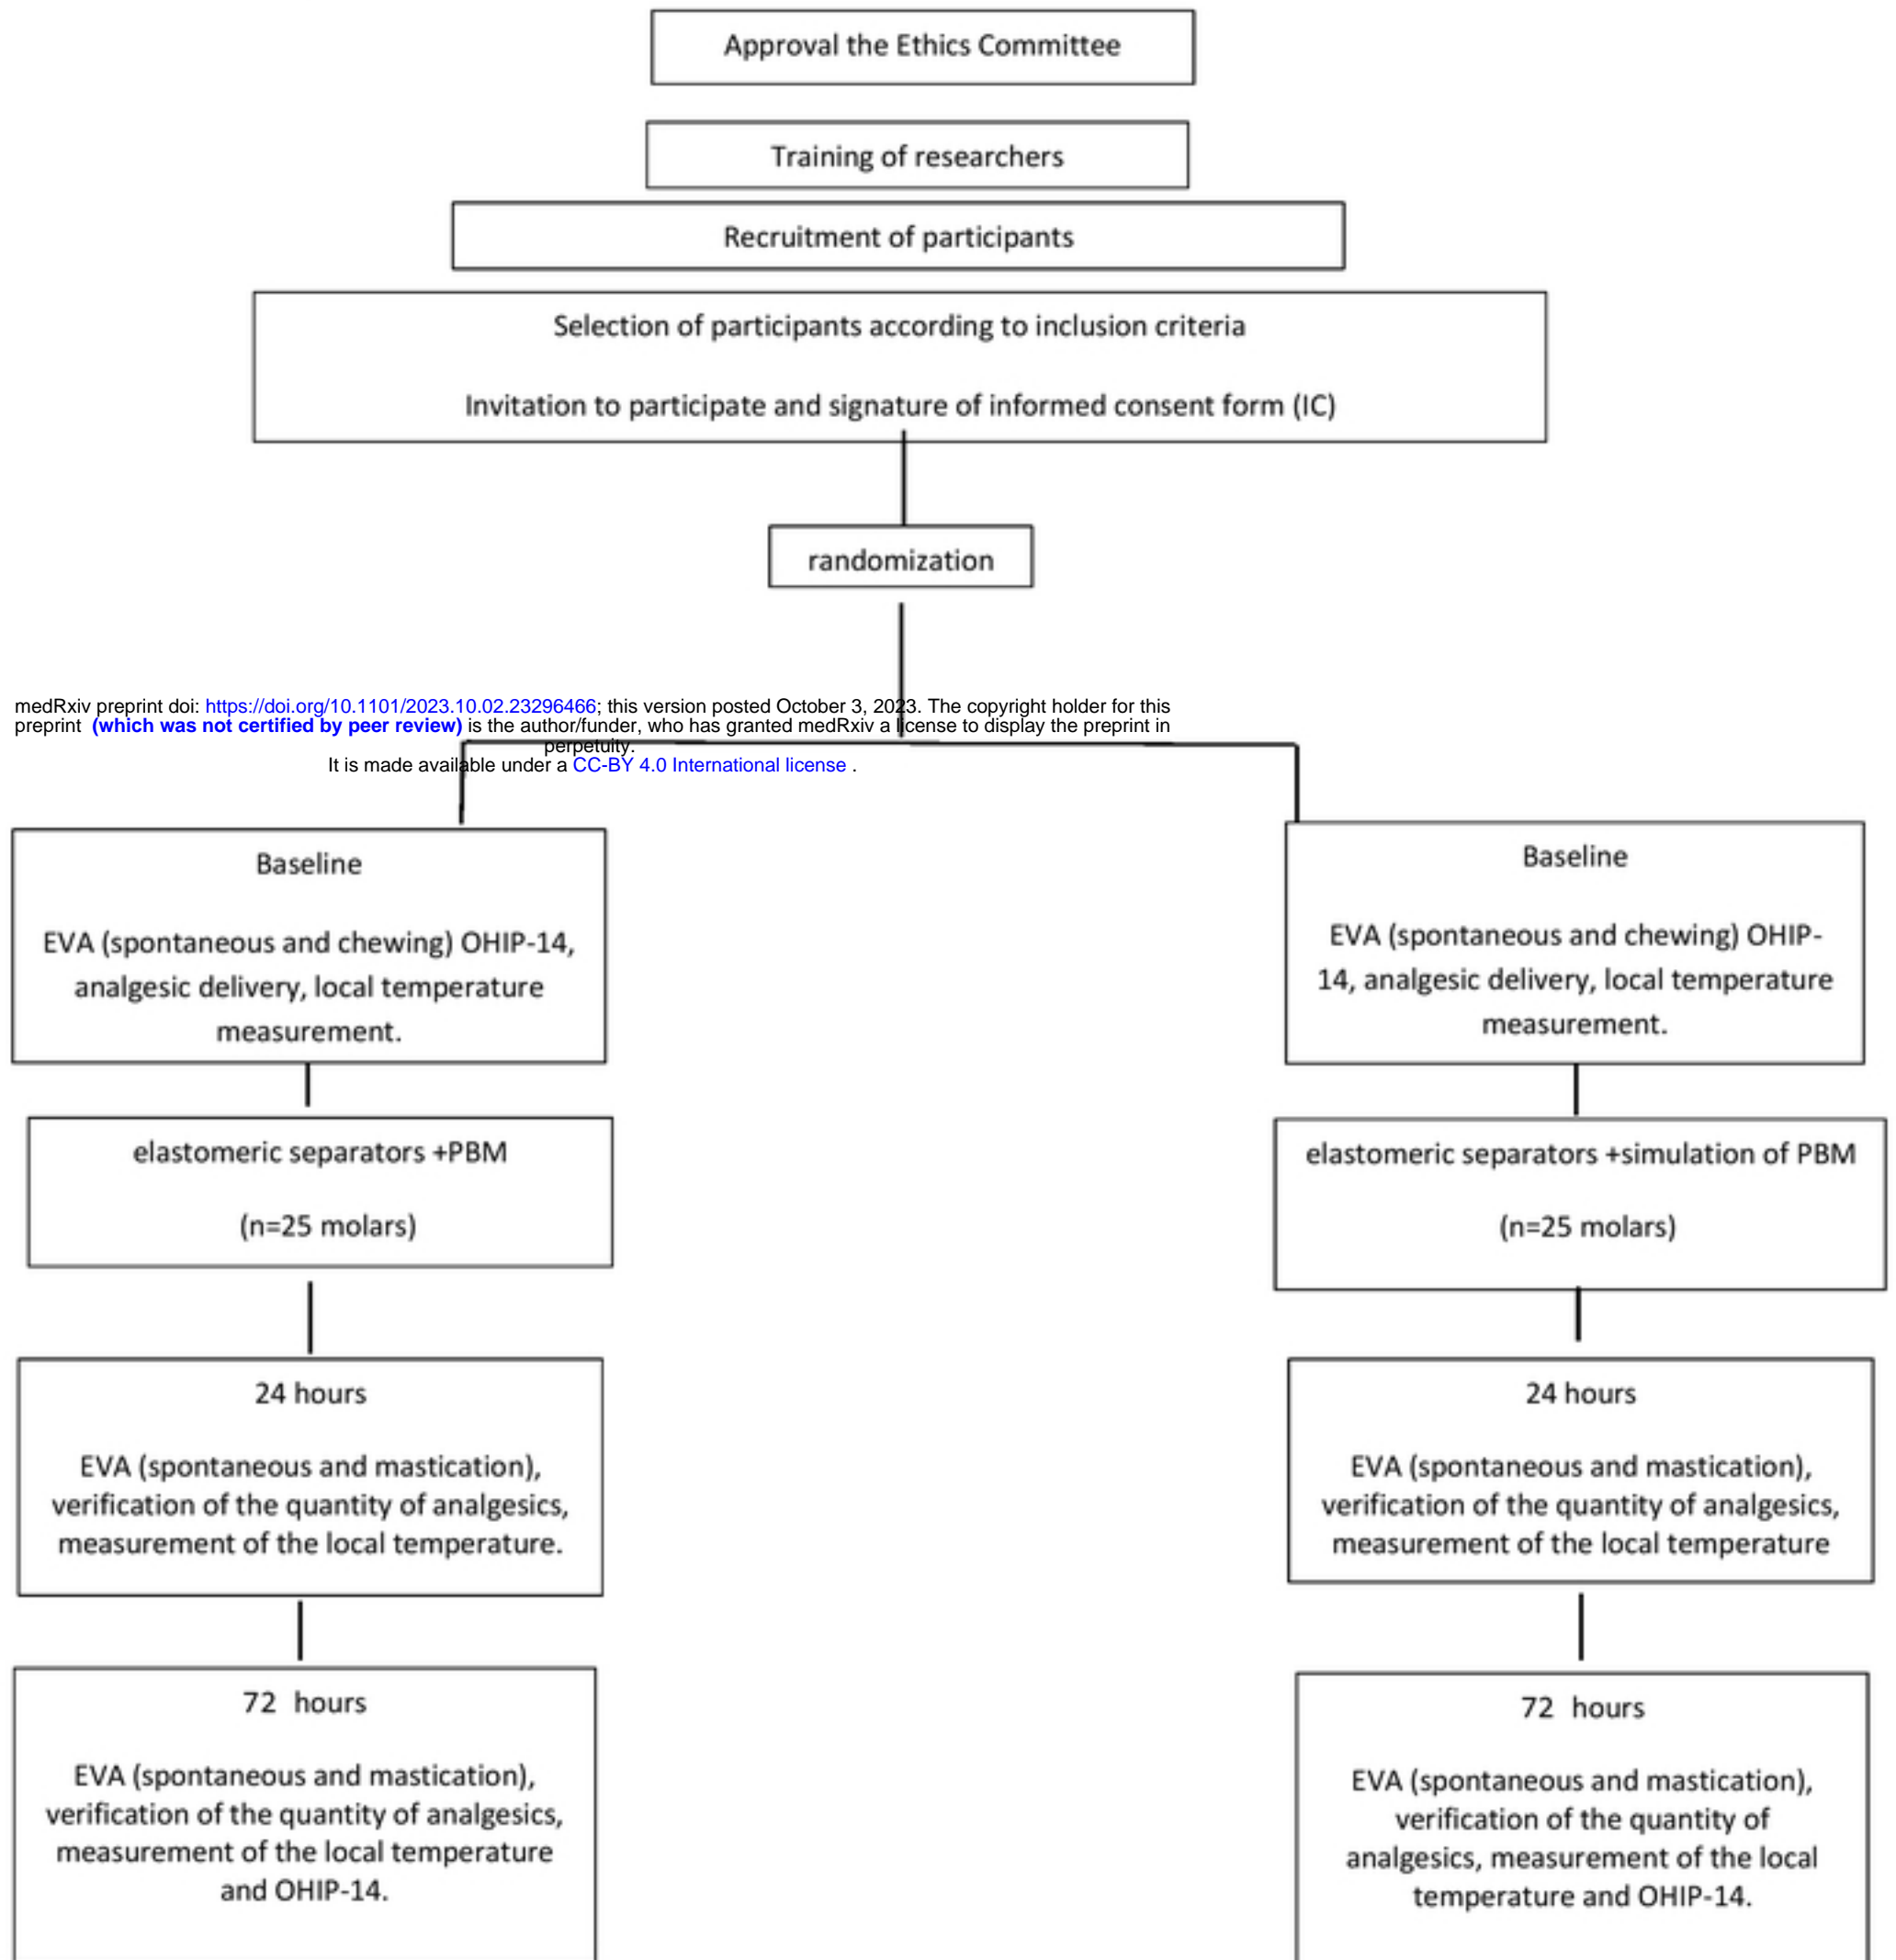

Figure 2

| TIME                         | STUDY PERIOD    |                   |                  |                          |                          |
|------------------------------|-----------------|-------------------|------------------|--------------------------|--------------------------|
|                              | RECORD          | RANDOMIZA<br>TION | POS<br>OPERATIVE |                          | CLOSURE                  |
|                              | -T <sub>1</sub> | 0                 | T <sub>0</sub>   | T <sub>1</sub><br>(24 h) | T <sub>3</sub><br>(72 h) |
| <b>RECORD:</b>               |                 |                   |                  |                          |                          |
| Inclusion/exclusion criteria | X               |                   |                  |                          |                          |
| Informed consent             | X               |                   |                  |                          |                          |
| Research calibration         | X               |                   |                  |                          |                          |
| Assignment                   |                 | X                 |                  |                          |                          |
| <b>INTERVENTIONS:</b>        |                 |                   |                  |                          |                          |
| Experimental group           |                 |                   | X                | X                        |                          |
| Control group                |                 |                   | X                | X                        |                          |
| <b>OUTCOMES:</b>             |                 |                   |                  |                          |                          |
| VAS                          |                 |                   | X                | X                        | X                        |
| Analgesics                   |                 |                   | X                | X                        | X                        |
| OHIP-14                      |                 |                   | X                |                          | X                        |
| Local temperature            |                 |                   | X                | X                        | X                        |

medRxiv preprint doi: <https://doi.org/10.1101/2023.10.02.23296466>; this version posted October 3, 2023. The copyright holder for this preprint (which was not certified by peer review) is the author/funder, who has granted medRxiv a license to display the preprint in perpetuity. It is made available under a [CC-BY 4.0 International license](https://creativecommons.org/licenses/by/4.0/).

Figure 1

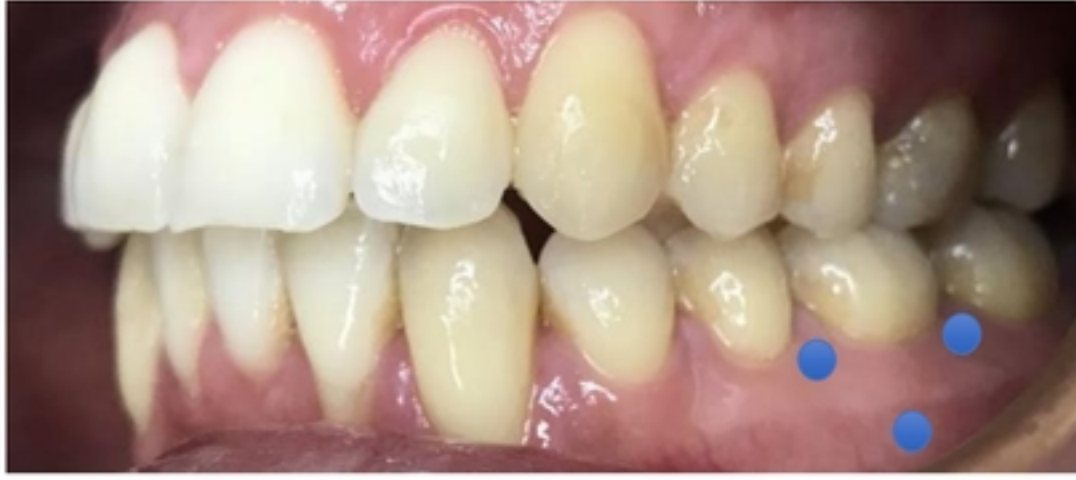

**Figure 4 - Laser application regions on the vestibular face. In the same position, lingual irradiation will be carried out (source: case of the Clínica de Salud UCUDAL)**

medRxiv preprint doi: <https://doi.org/10.1101/2023.10.02.23296466>; this version posted October 3, 2023. The copyright holder for this preprint (which was not certified by peer review) is the author/funder, who has granted medRxiv a license to display the preprint in perpetuity. It is made available under a [CC-BY 4.0 International license](#).
